# Supplementary material
Source: publisher figshare collection journal article supplement (https://acs.figshare.com/ndownloader/files/9950509)
Supplement: Supplementary file 1 [file 9950509]

**Support Information for:**

**Detailed understanding of the DBU/CO<sub>2</sub> switchable solvent system for cellulose solubilization and derivatization**

*Kelechukwu N. Onwukamike,<sup>a,b</sup> Thierry Tassaing,<sup>c</sup> Stéphane Grelier,<sup>b</sup> Etienne Grau,<sup>b</sup> Henri Cramail,<sup>b\*</sup> Michael A.R. Meier<sup>a\*</sup>*

<sup>a</sup> Institute of Organic Chemistry (IOC), Materialwissenschaftliches Zentrum (MZE), Karlsruhe Institute of Technology (KIT), Straße am Forum 7, 76131 Karlsruhe, Germany; Email: m.a.r.meier@kit.edu; web: www.meier-michael.com

<sup>b</sup> Laboratoire de Chimie des Polymères Organiques, Université de Bordeaux, UMR5629, CNRS - Bordeaux INP - ENSCBP, 16 Avenue Pey-Berland, 33607 Pessac Cedex France

<sup>c</sup> Institut des Sciences Moléculaires, U.M.R. 5255 CNRS - Université de Bordeaux, 351, Cours de la Libération 33405 Talence-France

***I: FT-IR monitoring of stability of in-situ carbonate of octanol with temperature using DBU, MTBD and TMG as super bases***

***II: FT-IR monitoring of cellulose solubilization for pressure and temperature optimization***

***III: Concentration study of cellulose solubilization at various temperature***

***IV: Concentration study of octanol***

***V: Characterization of synthesized model octanol carbonate***

***VI: Characterization of synthesized cellulose carbonate***

**I: FT-IR monitoring of stability of *in-situ* carbonate of octanol with temperature using DBU, MTBD and TMG as super bases**

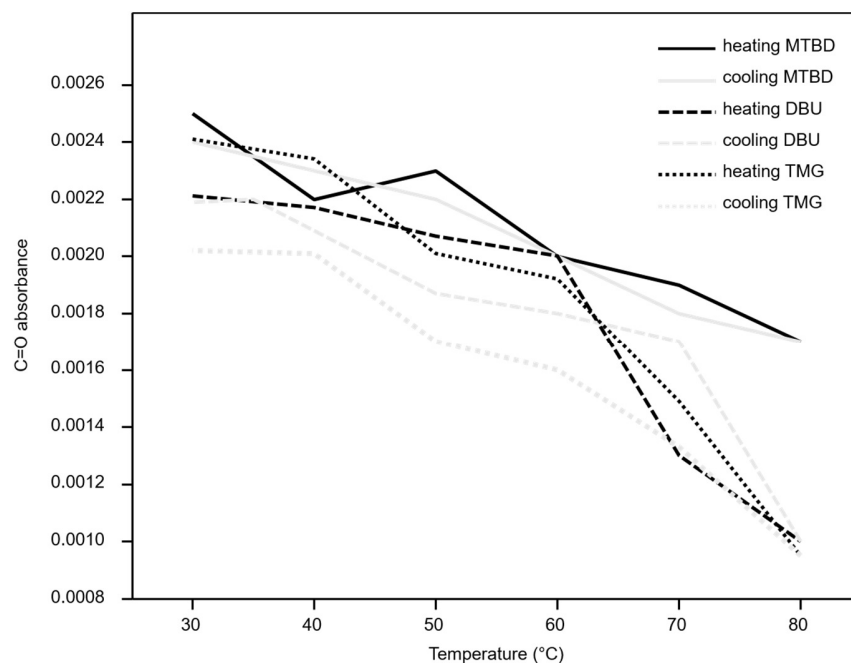

**Figure S1:** FT-IR C=O absorbance at  $1665\text{ cm}^{-1}$  during stability study of *in-situ* formed carbonate of octanol at different temperatures using DBU, MTBD and TMG as super bases (conditions: 20 bar  $\text{CO}_2$ , 30 °C).

## II: FT-IR monitoring of cellulose solubilization for pressure and temperature optimization

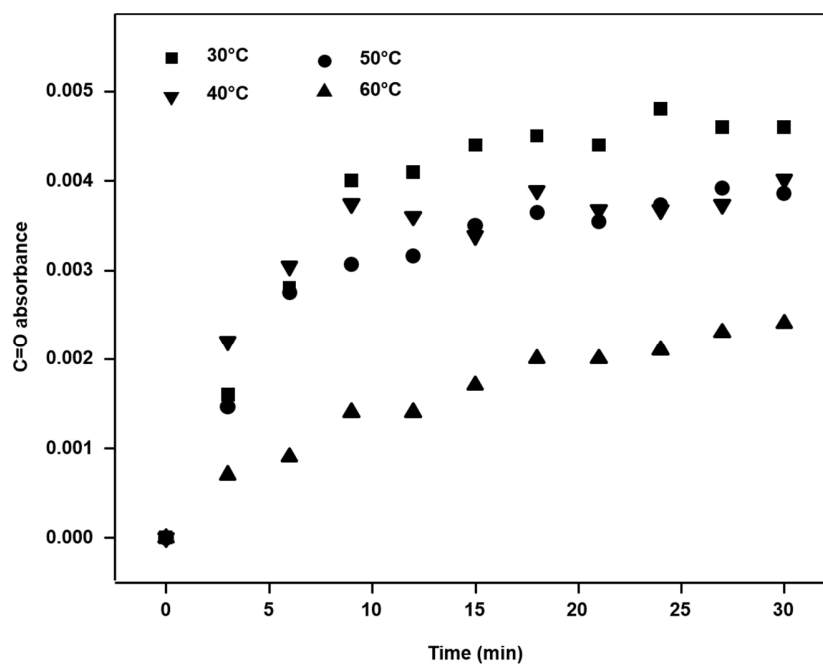

**Figure S2:** FT-IR C=O absorbance at 1665 cm<sup>-1</sup> during cellulose (3 % (w/w)) solubilization with DBU as super base and 10 bar CO<sub>2</sub> at different temperatures observed over time.

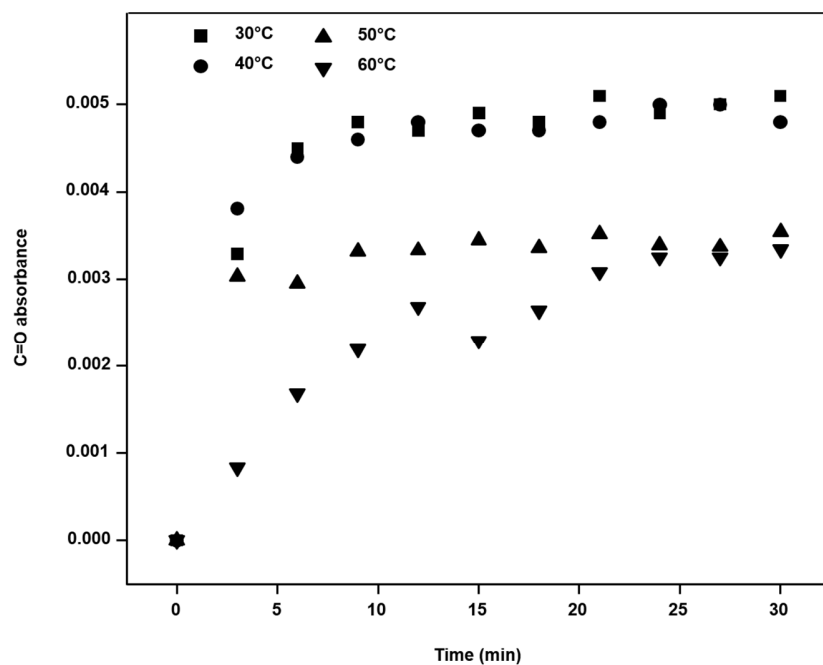

**Figure S3:** FT-IR C=O absorbance at 1665 cm<sup>-1</sup> during cellulose (3 % (w/w)) solubilization with DBU as super base and 20 bar CO<sub>2</sub> at different temperatures observed over time.

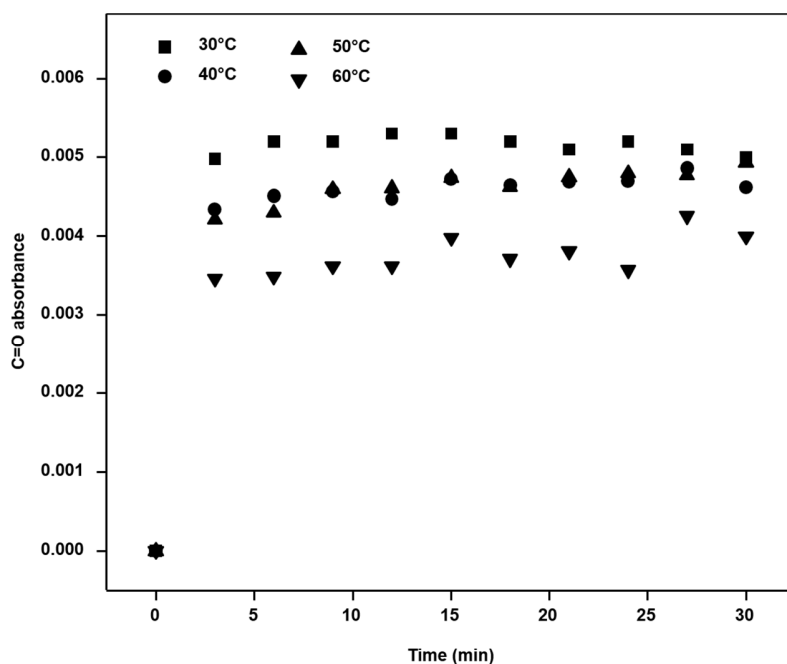

**Figure S4:** FT-IR C=O absorbance at  $1665\text{ cm}^{-1}$  during cellulose (3 % (w/w)) solubilization with DBU as super base and 40 bar  $\text{CO}_2$  at different temperatures observed over time.

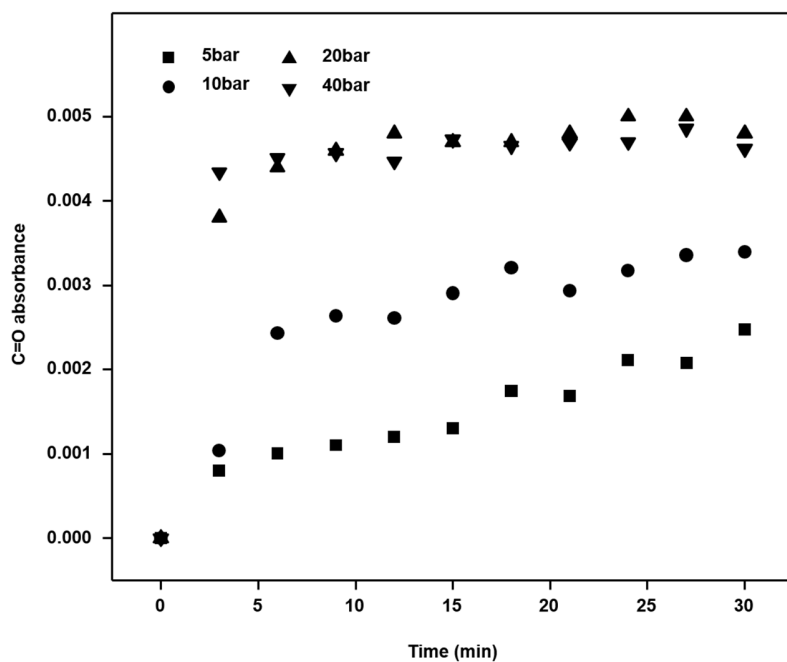

**Figure S5:** FT-IR C=O absorbance at  $1665\text{ cm}^{-1}$  during cellulose (3 % (w/w)) solubilization with DBU as super base at  $40\text{ }^\circ\text{C}$  at different  $\text{CO}_2$  pressures (in bar) observed over time.

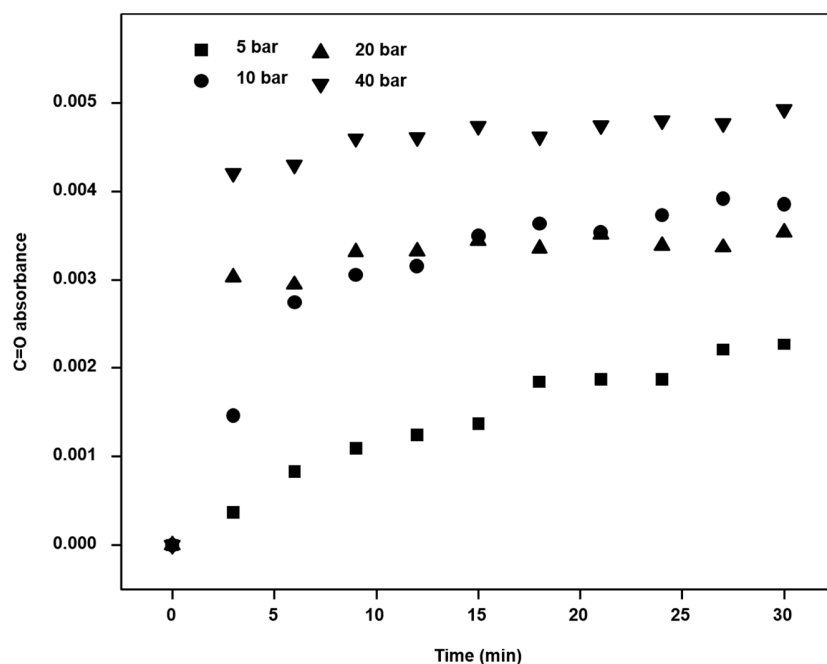

**Figure S6:** FT-IR C=O absorbance at 1665 cm<sup>-1</sup> during cellulose (3 % (w/w)) solubilization with DBU as super base at 50 °C at different CO<sub>2</sub> pressures (in bar) observed over time.

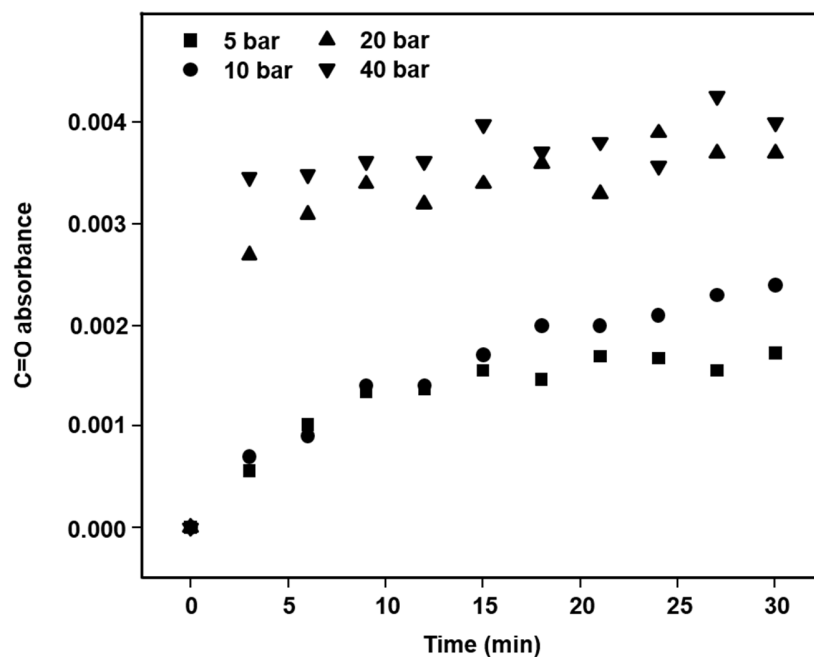

**Figure S7:** FT-IR C=O absorbance at 1665 cm<sup>-1</sup> during cellulose (3 % (w/w)) solubilization with DBU as super base at 60 °C at different CO<sub>2</sub> pressures (in bar) observed over time.

### III: Concentration study of cellulose solubilization

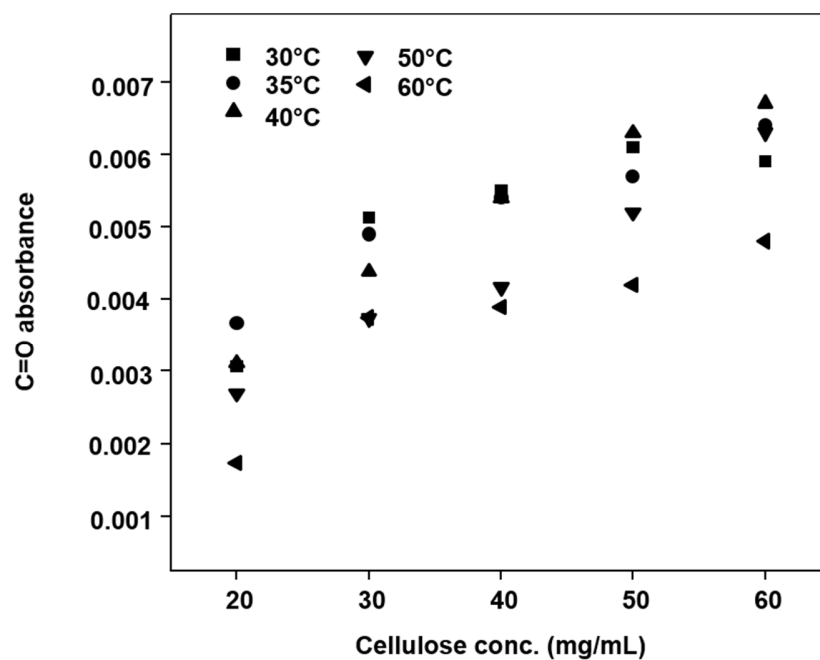

**Figure S8:** FT-IR C=O absorbance at  $1665\text{ cm}^{-1}$  during cellulose solubilization using DBU as super base after 20 bar of  $\text{CO}_2$  applied for 15 minutes at various temperatures (30, 35, 40, 50, 60 °C) and varying cellulose concentration.

#### IV: Concentration study of octanol

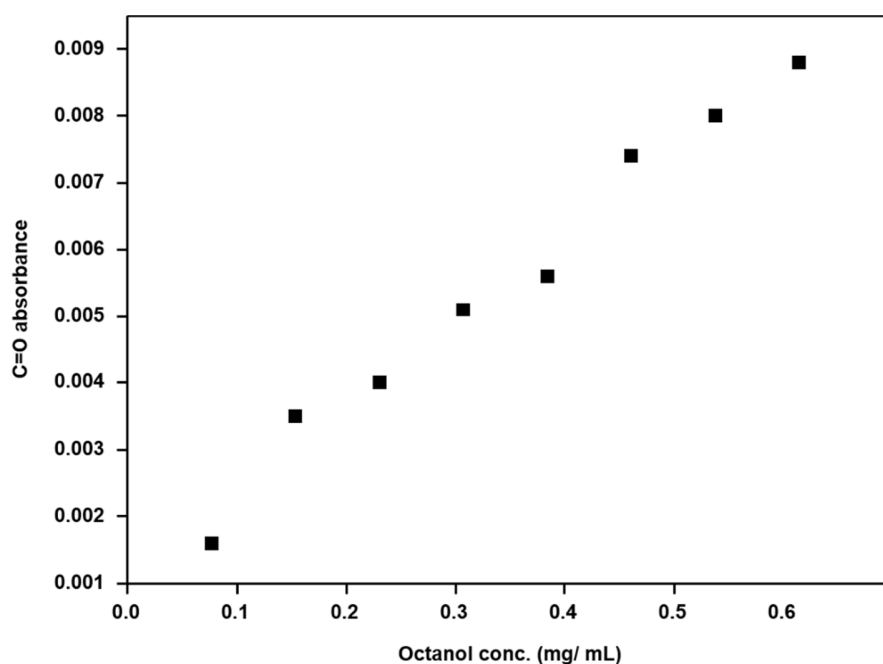

**Figure S9:** FT-IR C=O absorbance at  $1665\text{ cm}^{-1}$  during variation in octanol concentration using DBU as super base after 20 bar of  $\text{CO}_2$  applied for 15 minutes at  $30\text{ }^\circ\text{C}$ .

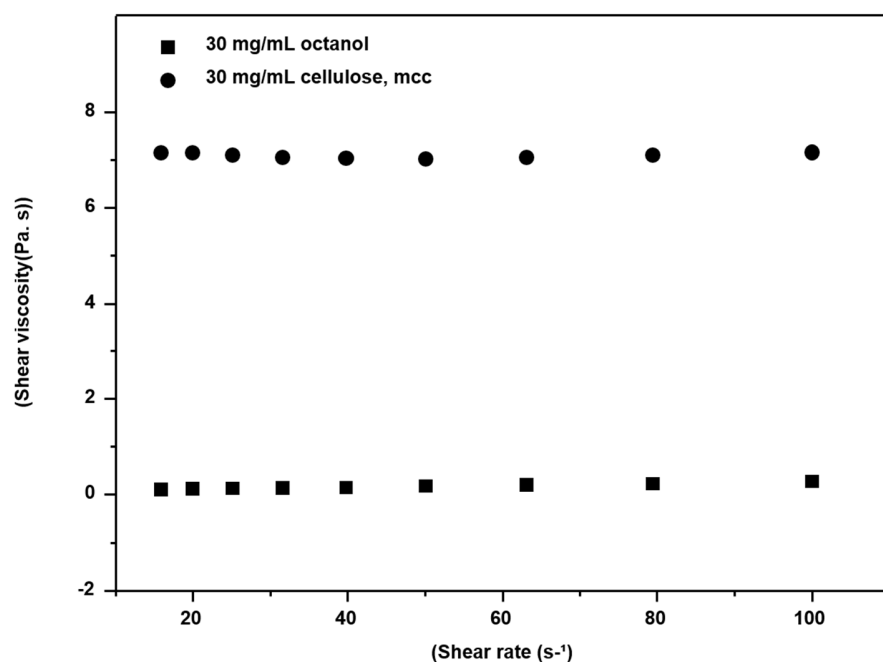

**Figure S10:** Viscosity measurement comparison between octanol and cellulose in a DBU-DMSO- $\text{CO}_2$  solvent mixture at concentration of 30 mg/mL.

**V: Characterization of synthesized model octanol carbonate**

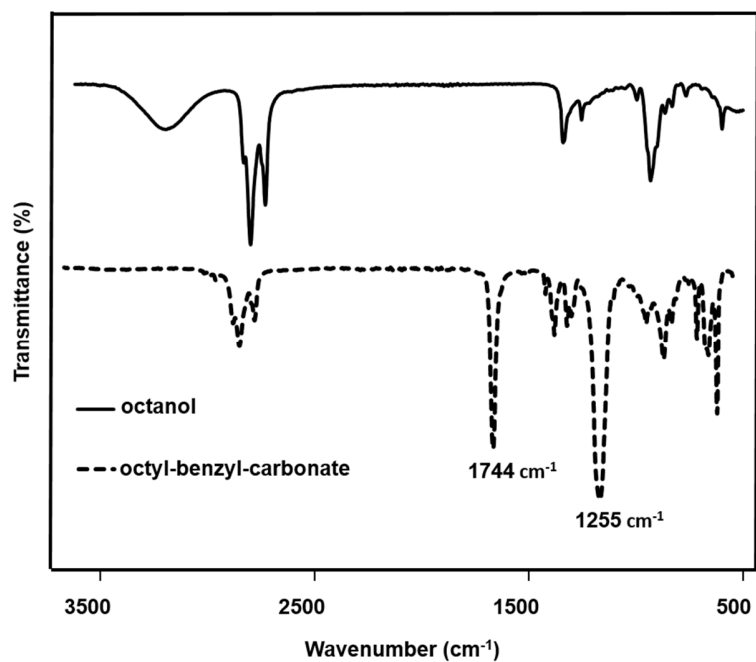

**Figure S11:** FT-IR spectra of octanol and octyl-benzyl-carbonate.

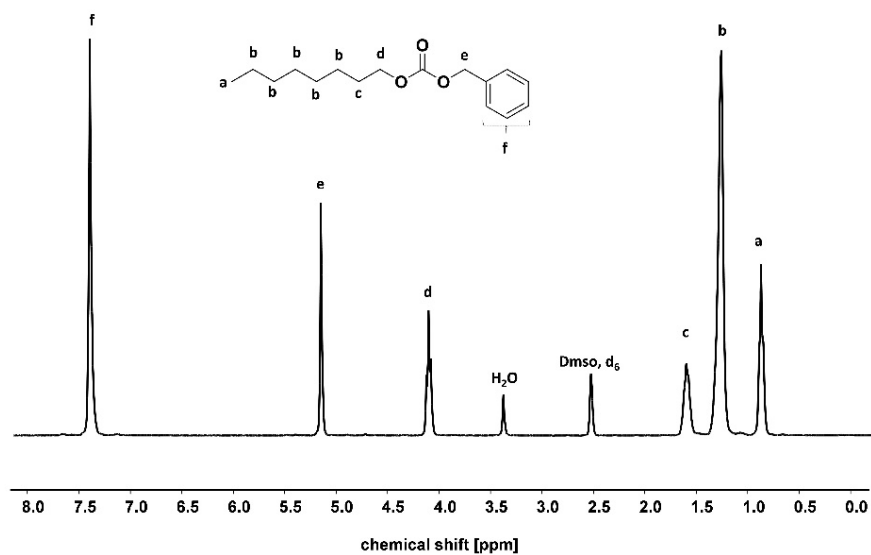

**Figure S12:** <sup>1</sup>H NMR spectrum of octyl-benzyl-carbonate.



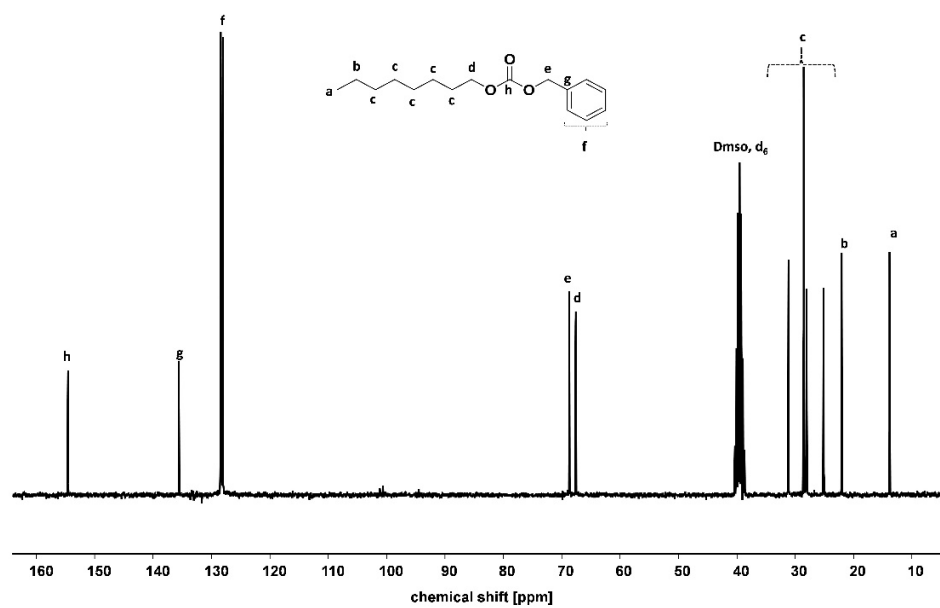

**Figure S13:**  $^{13}\text{C}$  NMR spectrum of octyl-benzyl-carbonate.

## VI: Characterization of synthesized cellulose carbonate

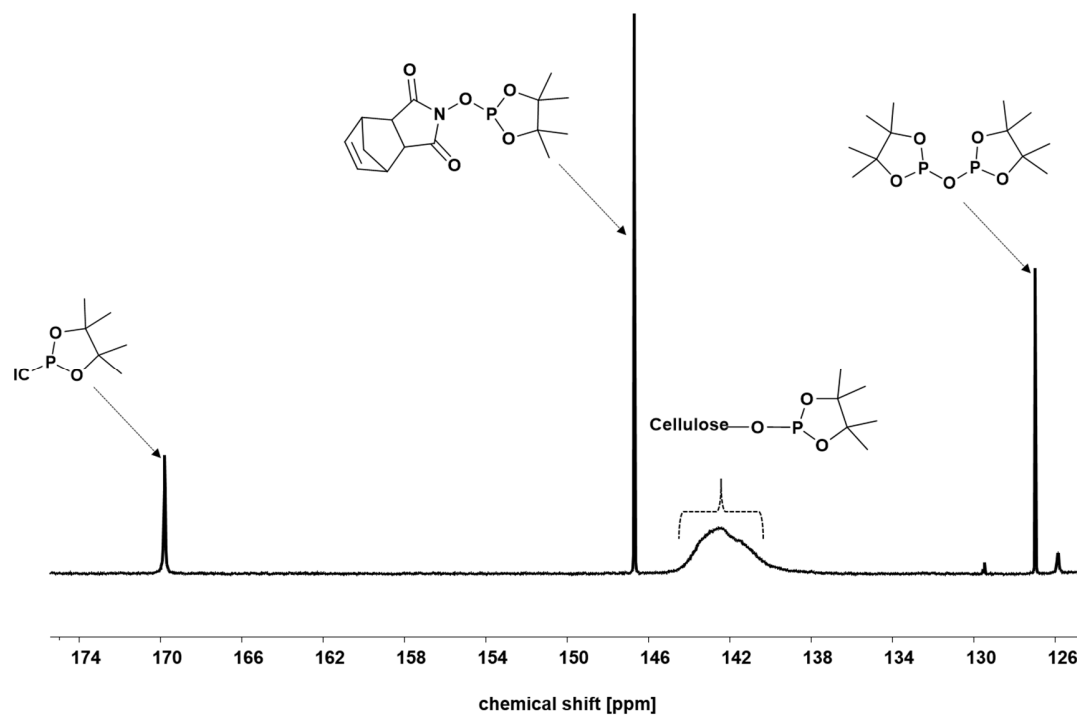

**Figure S14:**  $^{31}\text{P}$  NMR of cellulose-benzyl-carbonate for DS determination.

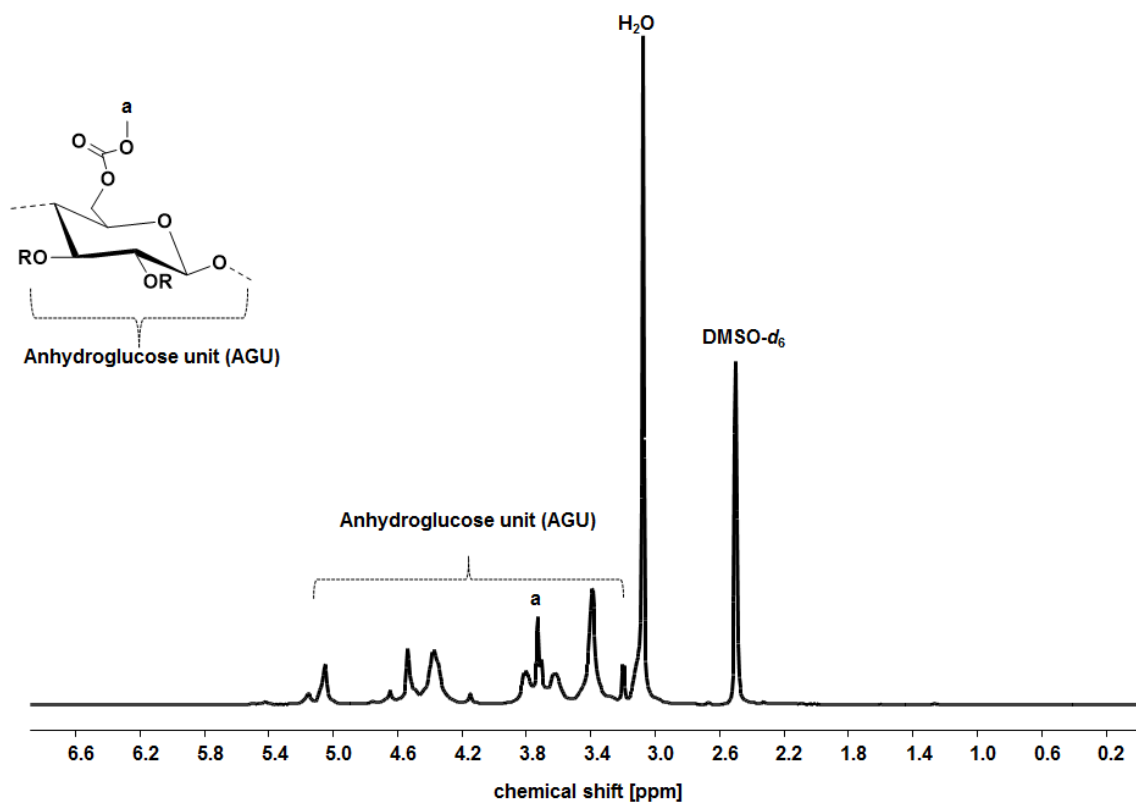

**Figure S15:**  $^1\text{H}$  NMR spectrum of cellulose-methyl-carbonate measured in  $\text{DMSO-}d_6$  at  $80^\circ\text{C}$ .

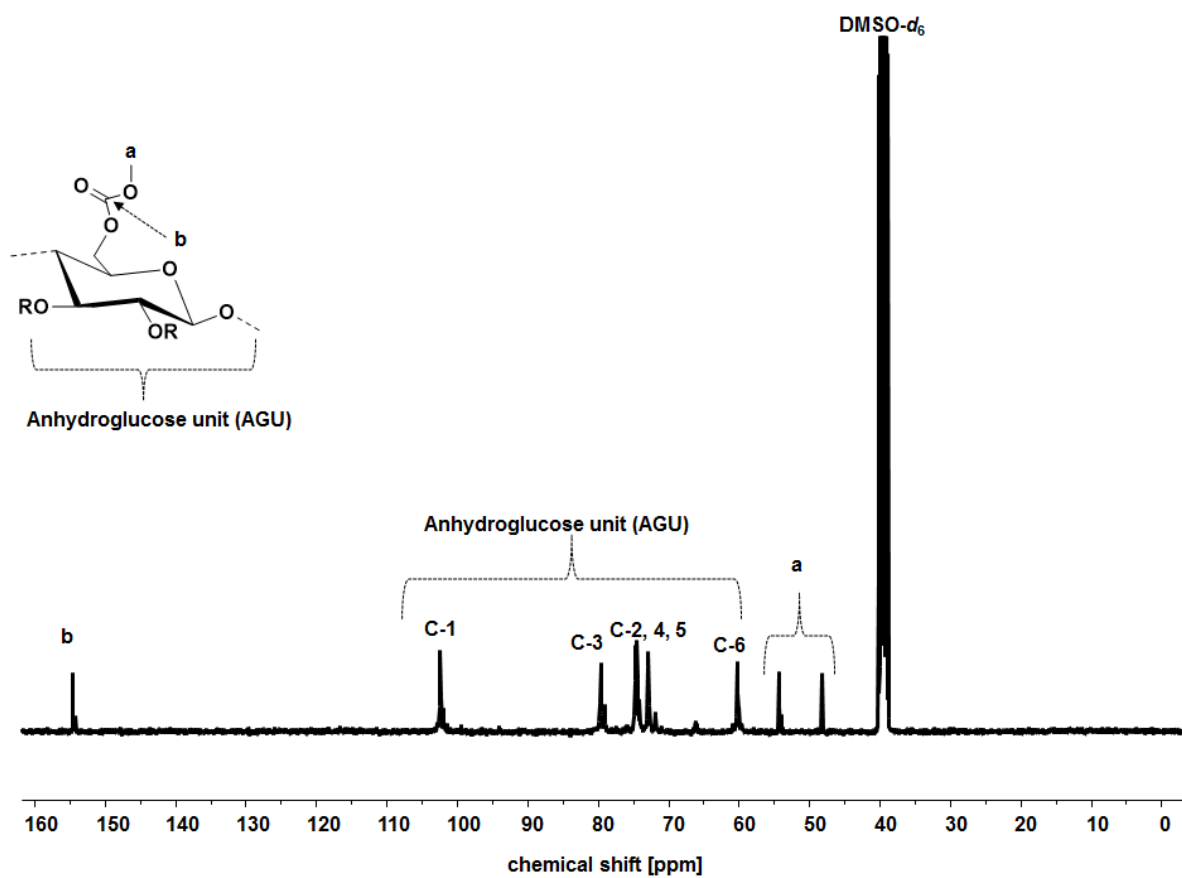

**Figure S16:**  $^{13}\text{C}$  NMR of cellulose-methyl-carbonate measured in  $\text{DMSO} (d_6)$  at  $80^\circ\text{C}$ .
